# Supplementary material
Source: PubMed Central journal article supplement (PMC6656381)
Supplement: NIHMS1027955-supplement-Figures_labels.pdf [file NIHMS1027955-supplement-Figures_labels.pdf]

## **SUPPLEMENTANTARY MATERIAL**

Figure 4. - A tactile image acquired during the VTI probe insertion (Test 1) with anatomical landmarks and maximum pressure graphs (green lines, kPa) along anterior and posterior compartments.

Figure 5. - A tactile image acquired during the VTI probe elevation (Test 2) with anatomical landmarks and pressure values at specified locations (see A1-A3 and P1-P3 in Figure 2) along anterior and posterior compartments. The VTI software automatically identified all these 6 locations and shows the pressure values and gradient values (not shown) for these locations.

Figure 6. - A tactile image acquired during the VTI probe rotation (Test 3) with pressure values at specified locations (see S1 and S2 in Figure 2). The VTI software automatically identified all these 3 locations and shows the pressure values (local maximums) for these locations.

Figure 7. - A dynamic pressure patterns acquired during the Valsalva maneuver for anterior and posterior compartments (Test 4).

Figure 8. - A dynamic pressure patterns acquired during the voluntary muscle contraction for anterior and posterior compartments (Test 5).

Figure 9. - A dynamic pressure patterns acquired during the voluntary muscle contraction for left and right vaginal compartments (Test 6).

Figure 10. - A dynamic pressure patterns acquired during the involuntary muscle relaxation for anterior and posterior compartments (Test 7).

Figure 11. - A dynamic pressure patterns acquired during the reflex contraction (cough) for anterior and posterior compartments (Test 8).
